# Supplementary material for: Luminol-labeled gold nanoparticles for ultrasensitive chemiluminescence-based chemical analyses
Source: Royal Society of Chemistry journal article supplement (doi:10.1039/c3an01005h), 2013-01-01
Supplement: c3an01005h.pdf [file c3an01005h.pdf]

# Luminol-Labeled Gold Nanoparticles for Ultrasensitive Chemiluminescence-based Chemical Analysis

*Lateef U. Syed<sup>1</sup>, Luxi Z. Swisher<sup>1</sup>, Hannah Huff<sup>1</sup>, Caitlin Rochford<sup>2</sup>, Fengli Wang<sup>2</sup>, Jianwei Liu<sup>2</sup>,  
Judy Wu<sup>2</sup>, Mark Richter<sup>3</sup>, Sivasai Balivada<sup>4</sup>, Deryl Troyer<sup>4</sup>, and Jun Li <sup>\*</sup><sup>1</sup>*

<sup>1</sup> Department of Chemistry, Kansas State University, Manhattan, KS 66506

<sup>2</sup> Department of Physics and Astronomy, The University of Kansas, Lawrence, KS 66045

<sup>3</sup> Department of Molecular Biosciences, The University of Kansas, Lawrence, KS 66045

<sup>4</sup> Department of anatomy and physiology, Kansas State University, Manhattan, KS 66506

\* To whom correspondence should be addressed: Email: junli@ksu.edu

## Supplementary Information Figures:

**FIGURE S1:**

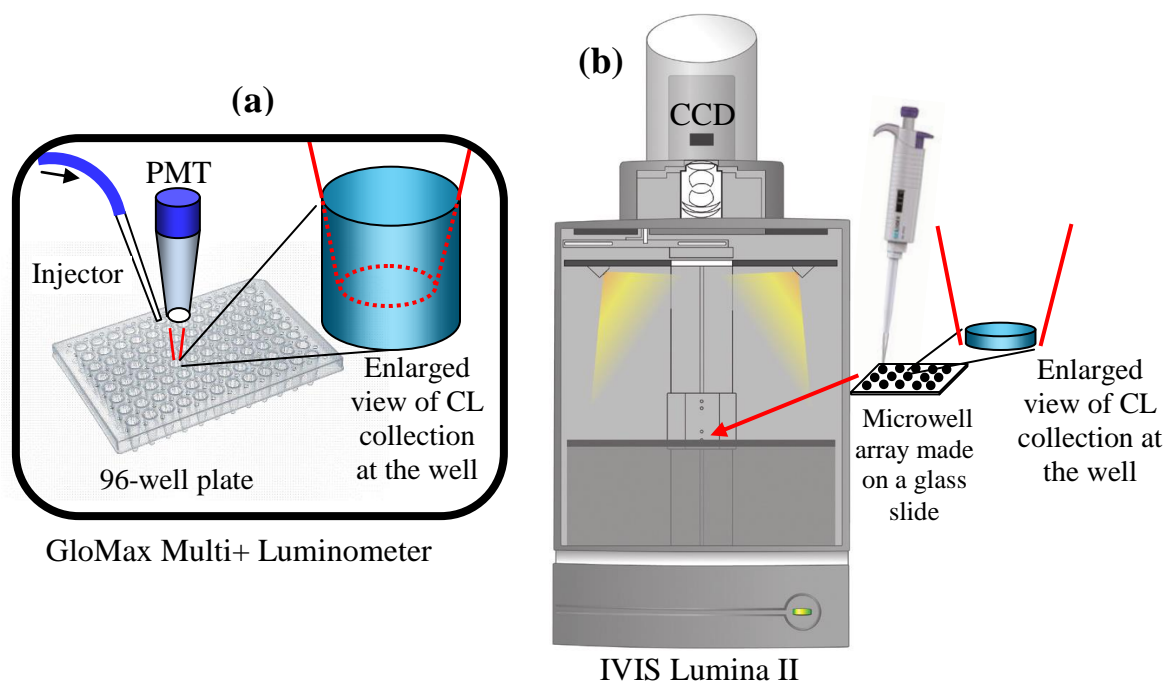

**Fig. S1** Schematics of the experimental configurations of chemiluminescence (CL) measurements using (a) GloMax Multi+ system made by Promega Corporation and (b) IVIS Lumina II system made by Caliper Life Sciences. The GloMax Multi+ system uses a photomultiplier tube (PMT) detector for the single-channel measurement of the kinetic signal from individual wells sequentially in a standard white polystyrene 96-well plate with 300  $\mu\text{L}$  per well ( $\sim 6.5$  mm in dia and  $\sim 11$  mm in depth). The IVIS Lumina II system uses a cooled Charge Coupled Device (CCD) camera to record videos of the luminescence signals from an array of microwells (1.5 mm deep oval-shaped wells with 3 and 4 mm widths) that were cut in a PDMS slab laid on a glass slide. The volume of each well is  $\sim 12$   $\mu\text{L}$ .

**FIGURE S2:**

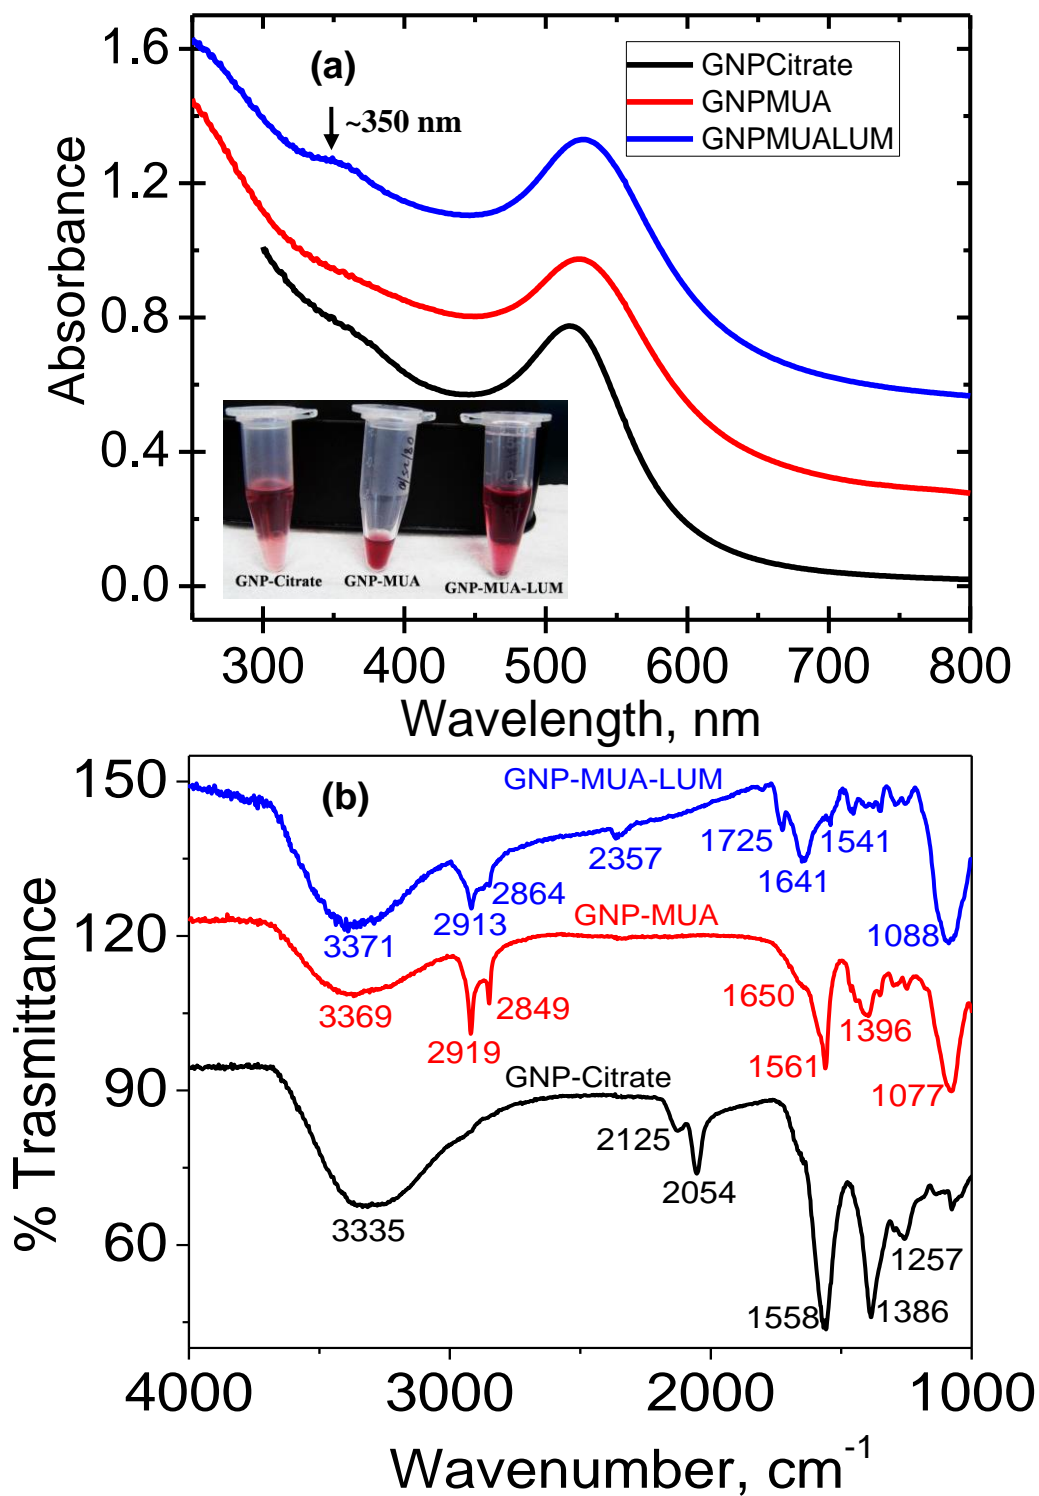

**Fig. S2** (a) UV-visible and (b) FT-IR spectra of citrate-stabilized GNPs (GNP-citrate, black curve), MUA modified GNPs after replacing citrate (GNP-MUA, red curve), and LUM attached

GNPs (GNP-MUA-LUM, blue curve). The concentrations are about  $(1.0 \text{ to } 1.2) \times 10^{12}$  GNPs/mL. The characteristic absorbance peaks at  $\sim 520$  nm in all three curves in (a) are attributed to the surface plasmon resonance (SPR) of 10-nm GNPs, which is consistent with red color of all three samples shown in the inset. The small peak at  $\sim 350$  nm in the blue curve of panel (a) corresponds to an absorption peak of luminol. The GNP-MUA (red) and GNP-MUA-LUM (blue) curves in panel (a) were translated upward by 0.2 and 0.5 units, respectively, along the y-axis for better view. The GNP-MUA and GNP-MUA-LUM curves in panel (b) were translated upward by 20 and 50 units, respectively, for the same reason.

**FIGURE S3:**

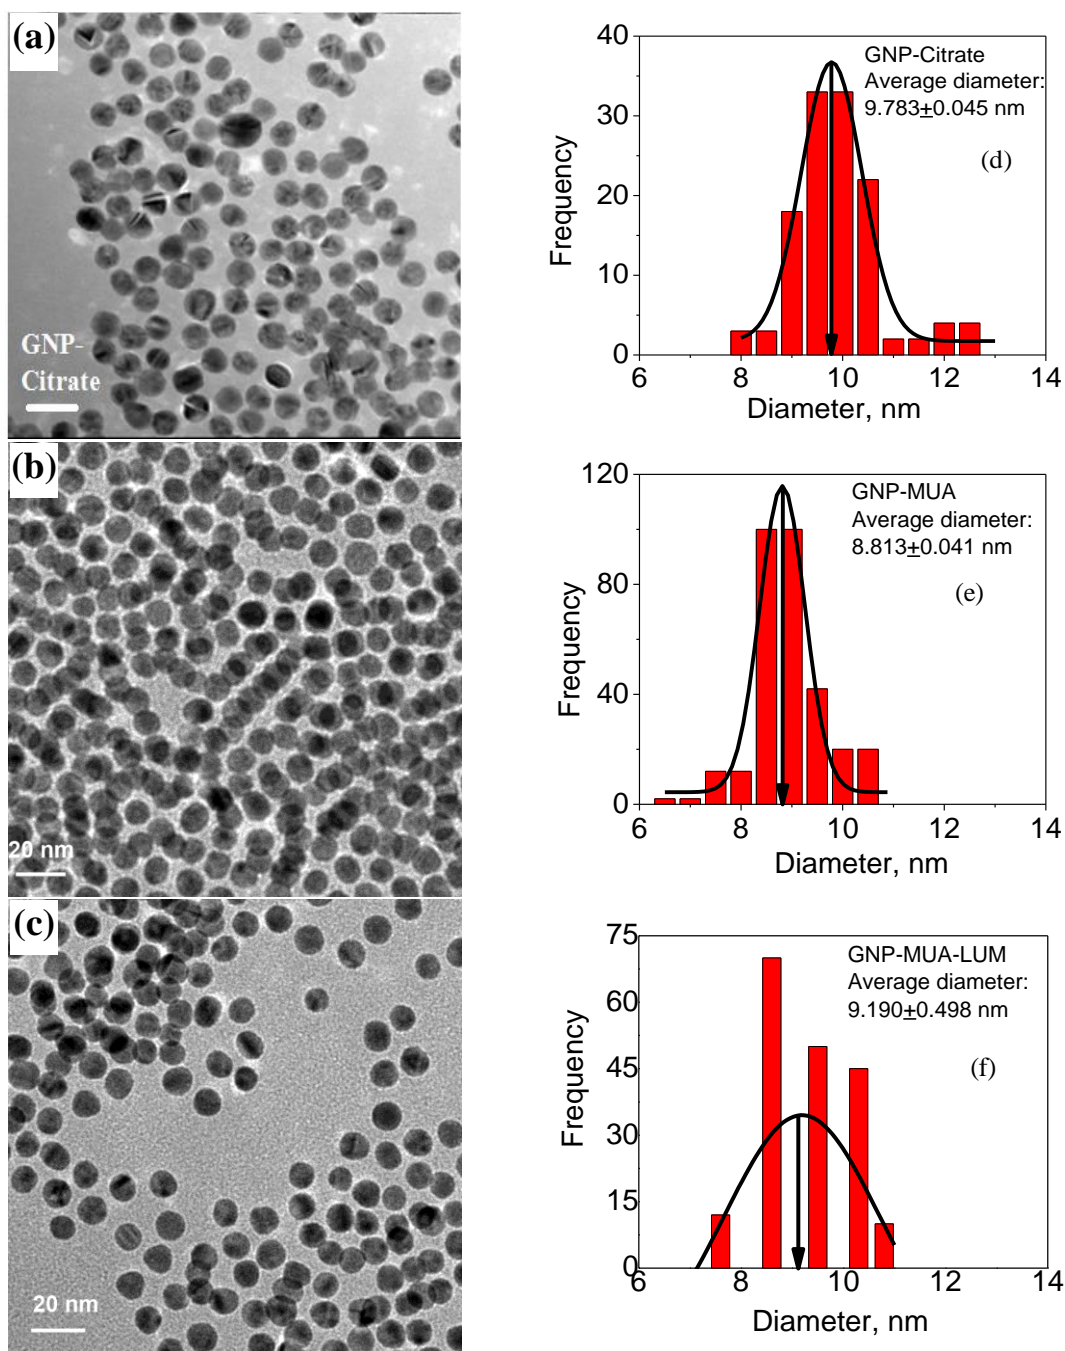

**Fig. S3** TEM images of gold nanoparticles (a) with the original citrate protection (GNP-citrate), (b) after ligand exchanging with mercaptoundecanoic acid (GNP-MUA), and (c) after luminol functionalization (GNP-MUA-LUM). The scale bars are 20 nm. (d)–(f) show the size distribution of GNPs from TEM images. The average diameters are  $\sim 9.8$ ,  $\sim 8.8$ , and  $\sim 9.2$  nm for GNP-citrate, GNP-MUA, and GNP-MUA-LUM, respectively.

**FIGURE S4:**

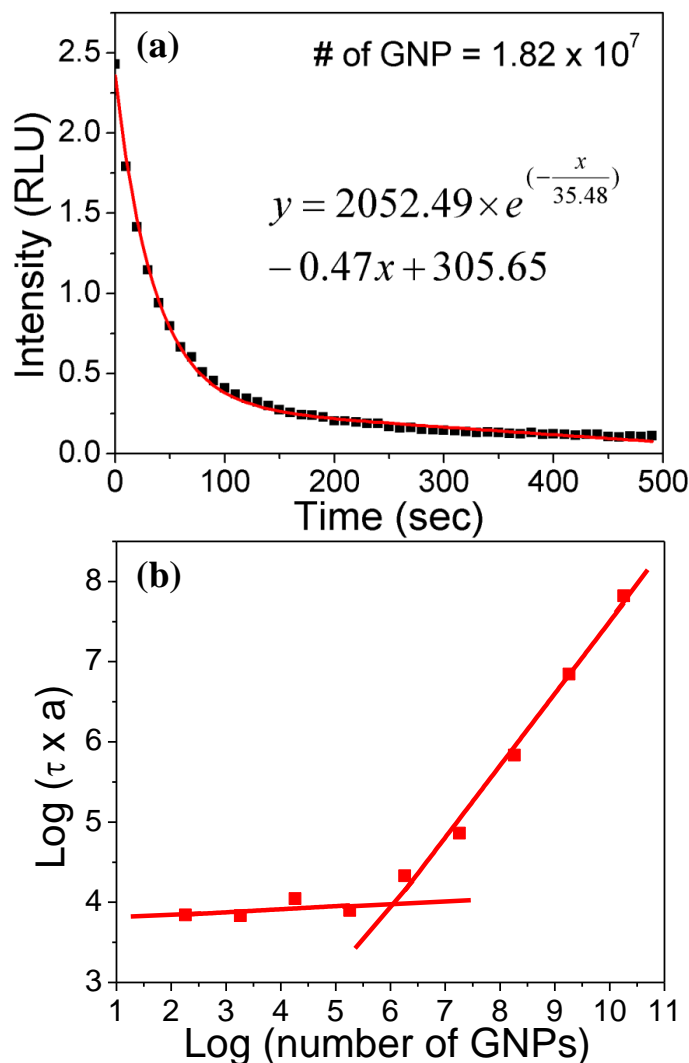

**Fig. S4** (a) The fitting of a representative kinetic chemiluminescence curve of GNP-MUA-LUM solutions (as shown in Figure 1) recorded with GloMax Multi+ system. In this set of data,  $1.82 \times 10^7$  GNP-MUA-LUM nanoparticles was used. The curve fits nicely with an exponential decay over a linear background. The decay time constant is 35 s. (b) The calibration curve using integrated CL signal (the initial intensity  $a$  multiplied by the decay time constant  $\tau$ ) instead of  $\Delta I$  in the vertical axis. The slopes of the two linear curves are 0.90 (at high N) and 0.038 (at low N), nearly the same as those using  $\Delta I$  (Fig. 3a).

**FIGURE S5:**

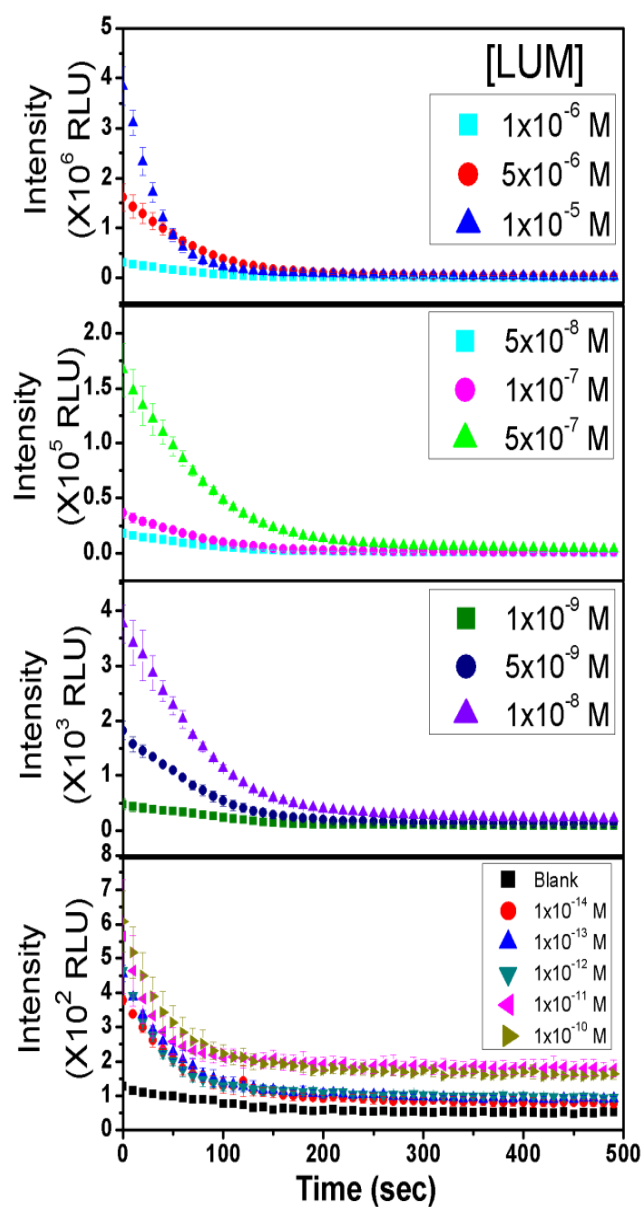

**Fig. S5** The kinetic CL measurements with bulk aqueous luminol solution at varied concentrations. The experimental conditions were identical with those in Fig. S2 except the GNP-MUA-LUM solutions being replaced with bulk luminol solutions. About 25  $\mu$ L of 0.10 M NaOH, 25  $\mu$ L of 1.41 M  $\text{H}_2\text{O}_2$  and 25  $\mu$ L of 1.0 mM  $\text{K}_3\text{Fe}(\text{CN})_6$  solution were preloaded in a 96-well plate. Then 25  $\mu$ L of aqueous luminol solution with varied concentration ( $1.0 \times 10^{-14}$  to  $1.0 \times 10^{-5}$  M) was added by the micro-injector to initialize the CL reaction.

**FIGURE S6:**

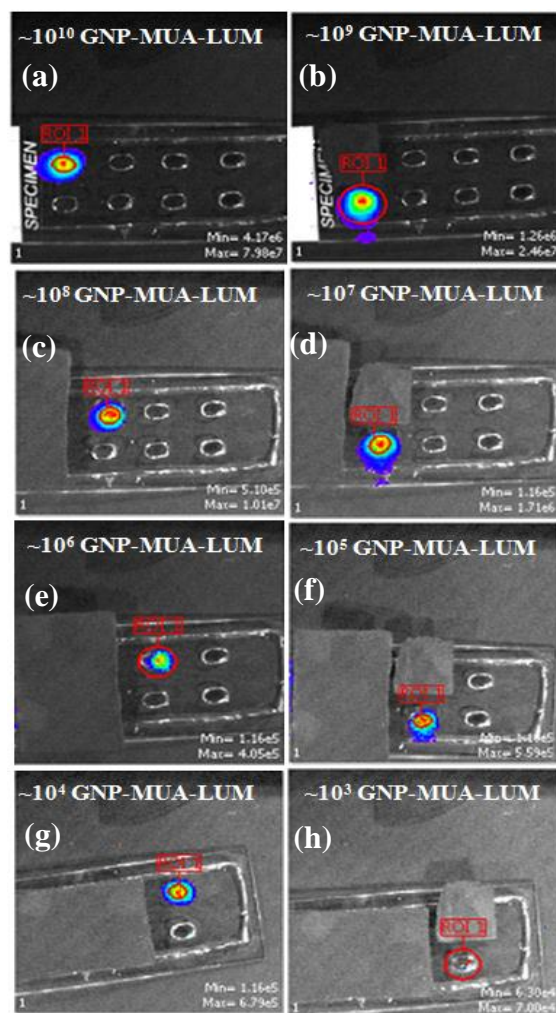

**Fig. S6** Chemiluminescence signal recorded by a CCD camera in IVIS Lumina II at PDMS microwells loaded with  $\sim 1.0 \times 10^{10}$  to  $1.0 \times 10^3$  luminol-labeled GNPs (GNP-MUA-LUM). The images are presented in pseudocolor to represent the chemiluminescence intensities. The number of GNP-MUA-LUM nanoparticles in the well is indicated on each image panel. All microwells measured earlier are covered with a piece of paper to cut down the cross-well background.



**FIGURE S7:**

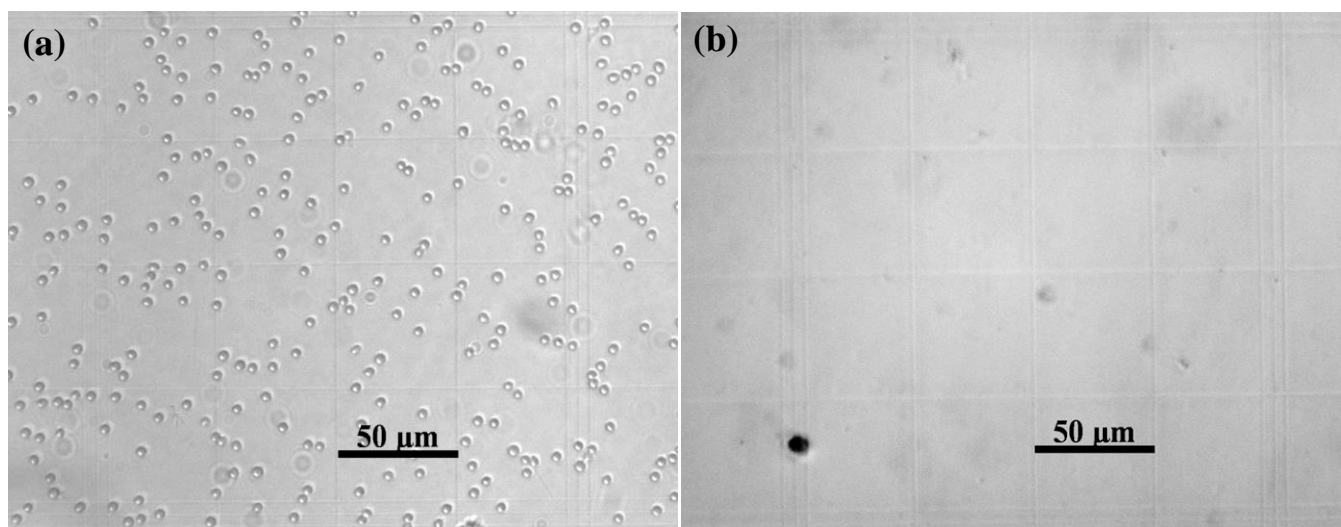

**Fig. S7** The bright-field image of (a) the intact (unlysed) and (b) the lysed sheep red blood cells in a Petroff Hausser counting chamber under an optical microscope. The stock solution was found to contain  $4.6 \times 10^9$  cells/mL with the size of the red blood cells of  $\sim 4\text{--}5\ \mu\text{m}$  in diameter.

**FIGURE S8:**

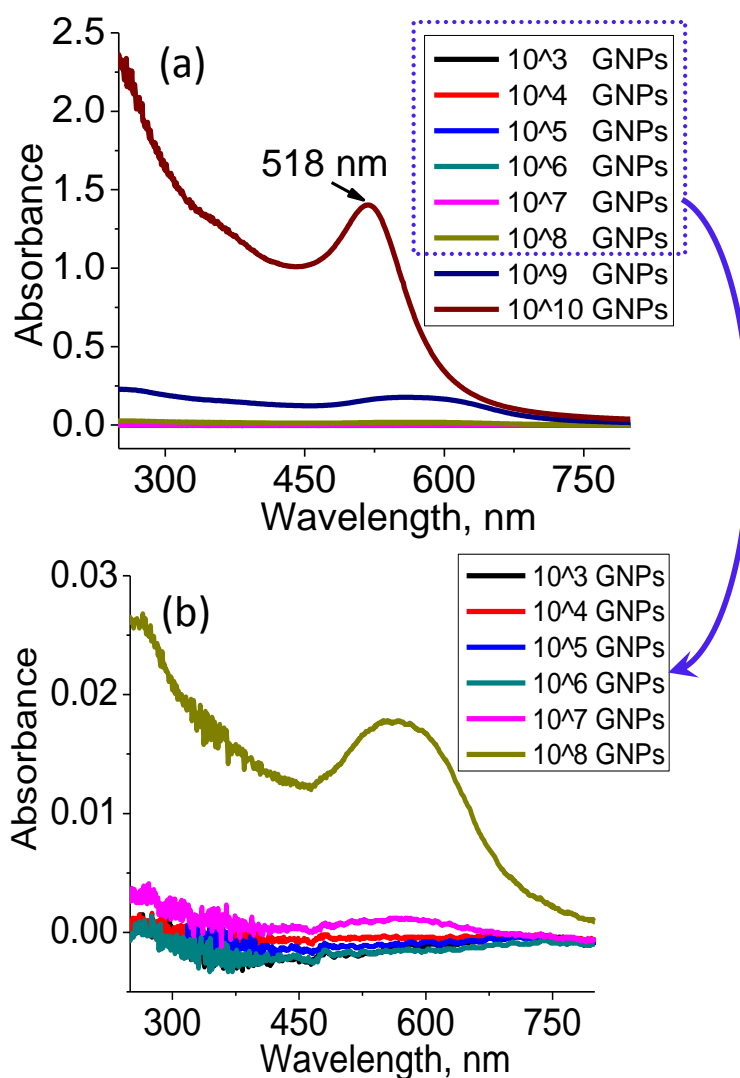

**Fig. S8** (a) The UV-Visible absorption spectra measured with varying number of GNP-MUA-LUM in 350  $\mu$ L solution in a microcuvette with an optical pathlength of 10.0 mm. (b) The enlarged view to show the absorption spectra of highly diluted GNP-MUA-LUM solutions.

**FIGURE S9:**

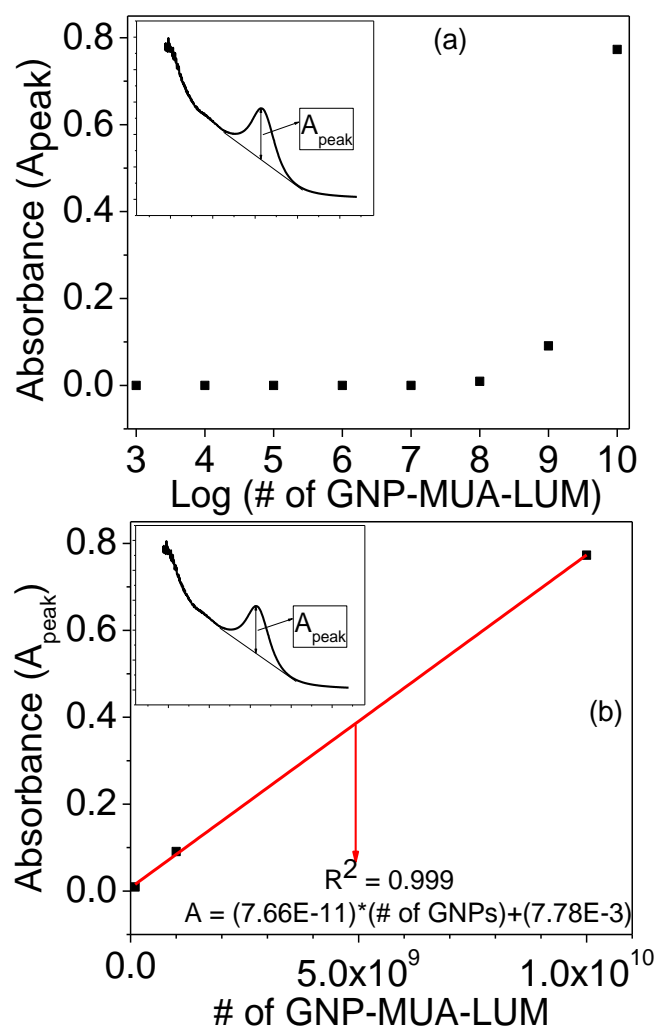

**Fig. S9** The background subtracted peak absorbance ( $A_{\text{peak}}$ ) at ~520 nm derived from the UV-visible spectra shown in Figures S8a and S8b. (a) The value of  $A_{\text{peak}}$  vs. the logarithm of the number of luminol-labeled GNPs. (b) The linear plot of  $A_{\text{peak}}$  vs. number of luminol-labeled GNPs obtained with the sample containing  $\sim 1.0 \times 10^{10}$ ,  $1.0 \times 10^9$  and  $1.0 \times 10^8$  GNP-MUA-LUM. The solid line in (b) is the linear fitting curve. This indicates that the UV-visible signal linearly decreases till  $10^8$  GNPs. The detection limit by UV-visible absorption is about  $10^7$ – $10^8$  GNPs in the 350  $\mu\text{L}$  microcuvette.

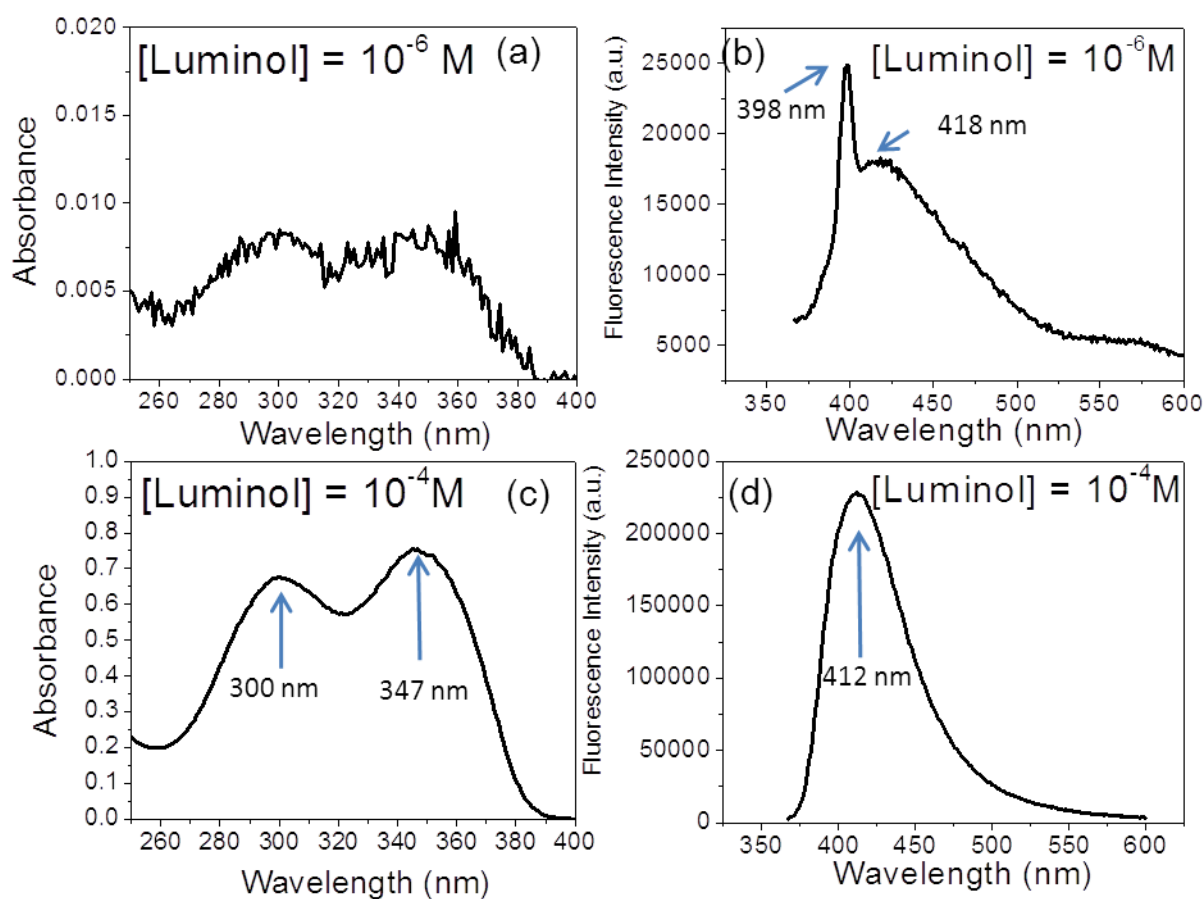

**Figure S10.** (a) & (c) The UV-visible absorption spectra of aqueous luminol solutions at concentration of  $1.0 \times 10^{-6} \text{ M}$  and  $1.0 \times 10^{-4} \text{ M}$ , respectively. (b) & (d) The corresponding fluorescence emission spectra of the two luminol solutions measured with the excitation wavelength of at 347 nm.
